# Supplementary material for: Arabidopsis Protein Phosphatase PIA1 Impairs Plant Drought Tolerance by Serving as a Common Negative Regulator in ABA Signaling Pathway
Source: MDPI journal article supplement (doi:10.3390/plants12142716), 2023-07-21
Supplement: s1 [file s1]

Supplementary Materials:

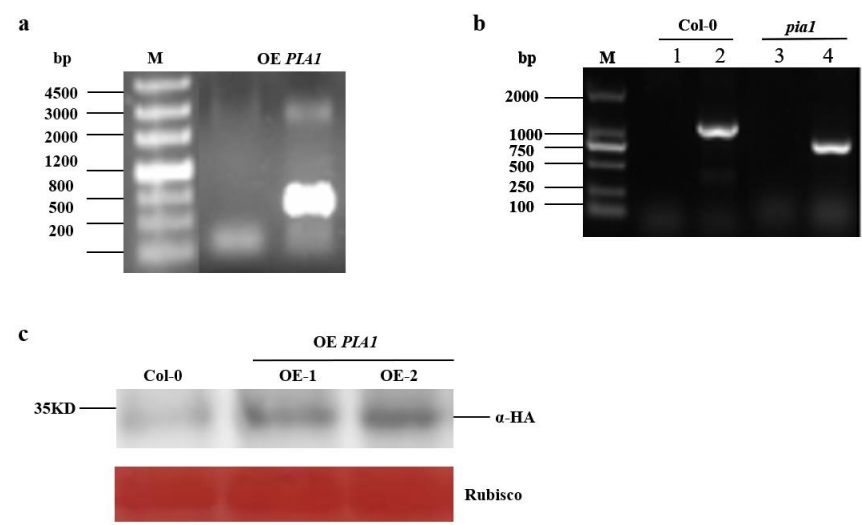

**Figure S1.** OE *PIA1* and *pia1* mutants identified by PCR and Western blot. **(a)** PCR identification of *PIA1*. **(b)** PCR identification of *pia1* mutant. **(c)** Identification of *PIA1* expression.

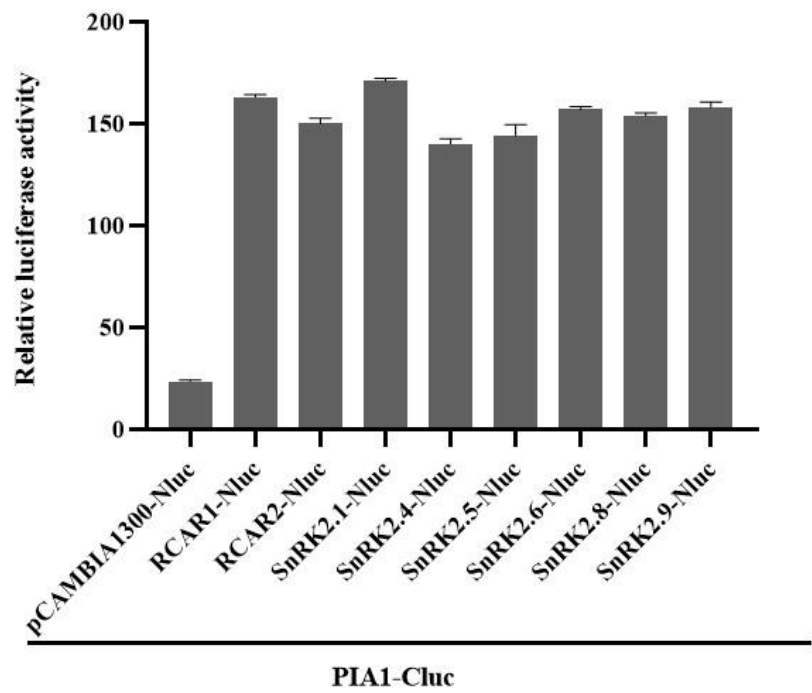

**Figure S2.** The luciferase activity measurement using a luminometer.

**Table S1.** Primers information.

| Prime name       | Primer sequence                                                                        |
|------------------|----------------------------------------------------------------------------------------|
| <i>pia1</i>      | LP: GGCTGCATCAATCAAACAAAC<br>RP: CGGTGTTGCTTCTCAACTCTC<br>BP: ATTTTGCCGATTTCGGAAC      |
| <i>Actin2</i>    | FP: CTTGTTCCAGCCCTCGTTTG<br>RP: CAGCGATACCTGAGAACATAGTGG                               |
| <i>RD29B</i>     | FP: TTCTGACCACACCAAACCCAT<br>RP: CAGCCAGTGCCTCATGTCC                                   |
| <i>ABI3</i>      | FP: CTCCGACGTCAAATGTGGCA<br>RP: CCACATTGCGCCGACGGAGAG                                  |
| <i>ABI5</i>      | FP: CGGGTTTGGATTAGGTTTAG<br>RP: GTAGTAGTAGTAGTAATGGACAGA                               |
| <i>ABF4</i>      | FP: AACAACTTAGGAGGTGGTGGTC<br>RP: CTTCAGGAGTTCATCCATGTTC                               |
| <i>AD-PIA1</i>   | FP: GCCATGGAGGCCAGTGAATTCATGGCAGGCAGAGAGA                                              |
| <i>AD-PIA1</i>   | RP: CAGCTCGAGCTCGATGGATCCTCATCTACAATACCTTTCTGAG                                        |
| <i>Cluc-PIA1</i> | FP: TACGCGTCCCGGGGCGGTACATGGCAGGCAGAGA<br>RP: ACGAAAGCTCTGCAGGTCGACTCATCTACAATACCTTTCT |
